# Supplementary material for: Sludge biochar-based catalysts for improved pollutant degradation by activating peroxymonosulfate
Source: Royal Society of Chemistry journal article supplement (doi:10.1039/c8ta02282h), 2018-01-01
Supplement: c8ta02282h1.pdf [file c8ta02282h1.pdf]

*Supplementary information*

**Sludge biochar-based catalyst for improved pollutant degradation by activating  
peroxymonosulfate**

Bao-Cheng Huang, Jun Jiang, Gui-Xiang Huang, Han-Qing Yu\*

CAS Key Laboratory of Urban Pollutant Conversion, Department of Chemistry,

University of Science & Technology of China, Hefei 230026, China

**\*Corresponding author:** Prof. Han-Qing Yu, E-mail: [hqyu@ustc.edu.cn](mailto:hqyu@ustc.edu.cn)

This supporting information contains 19-page document, including 3 tables, 14 figures, references and this cover page.

**Table S1** Oxidant Dosages Reported in Literatures

| <b>Catalyst</b>                                  |            | <b>Pollutant</b> |               | <b>Oxidant</b> |              | <b>pH</b>   | <b>Oxidant utility</b><br>mol/mol oxidant/h | <b>Ref.</b>      |
|--------------------------------------------------|------------|------------------|---------------|----------------|--------------|-------------|---------------------------------------------|------------------|
| Type                                             | g/L        | Type             | mM            | Type           | mM           |             |                                             |                  |
| rGO                                              | 0.1-0.5    | Phenol           | 0.1225        | PMS            | 0.80-3.189   | 6.5         | 0.027                                       | 1                |
| N-CNT                                            | 0.2        | Phenol           | 0.2127        | PMS            | 3.25         | 6.5         | 0.087                                       | 2                |
| N-CNT                                            | 0.1        | Phenol           | 0.2127        | PMS            | 6.5          | 6.5         | 0.098                                       | 3                |
| Biochar                                          | 1          | PCB              | 0.0039        | PDS            | 8            | 7.4         | 0.00012                                     | 4                |
| Nanodiamond                                      | 0.1        | Phenol           | 0.01          | PDS            | 1            | 7.0         | 0.059                                       | 5                |
| CuO/Fe <sub>3</sub> O <sub>4</sub>               | 0.3        | Phenol           | 0.1           | PDS            | 5            | 5.6         | 0.008                                       | 6                |
| Fe <sub>x</sub> Co <sub>3-x</sub> O <sub>4</sub> | 0.1        | BPA              | 0.0877        | PMS            | 0.325        | 6.0         | 0.269                                       | 7                |
| Noble metals                                     | 0.25       | 4-CP             | 0.1           | PMS            | 0.25         | 7.0         | 1.6                                         | 8                |
| Fe-Mn-Co/C                                       | 0.1        | BPA              | 0.0877        | PMS            | 0.325        | 6.0         | 1.34                                        | 9                |
| <b>Biochar</b>                                   | <b>0.2</b> | <b>BPA</b>       | <b>0.0439</b> | <b>PMS</b>     | <b>0.041</b> | <b>4-10</b> | <b>3.21</b>                                 | <b>This work</b> |
| <b>Biochar</b>                                   | <b>0.2</b> | <b>Phenol</b>    | <b>0.106</b>  | <b>PMS</b>     | <b>0.122</b> | <b>6.0</b>  | <b>3.47</b>                                 | <b>This work</b> |
| <b>Biochar</b>                                   | <b>0.2</b> | <b>BPA</b>       | <b>0.0439</b> | <b>PDS</b>     | <b>0.093</b> | <b>6.0</b>  | <b>1.42</b>                                 | <b>This work</b> |

**Table S2** Elemental Compositions of As-prepared Biochars

| Pyrolysis temperature<br>°C | Elemental percentage (%) |   |    |    |       |
|-----------------------------|--------------------------|---|----|----|-------|
|                             | C                        | H | N  | O  | Total |
| 400                         | 64                       | 4 | 12 | 18 | 98    |
| 600                         | 68                       | 3 | 11 | 17 | 99    |
| 800                         | 71                       | 3 | 10 | 15 | 99    |

**Table S3** Main Metals in the Sewage Sludge

|            | <b>Ca</b> | <b>Mg</b> | <b>Al</b> | <b>Fe</b> | <b>Cu</b> | <b>Zn</b> | <b>Total</b> |
|------------|-----------|-----------|-----------|-----------|-----------|-----------|--------------|
| Amount (%) | 1.21      | 0.53      | 1.95      | 0.42      | 0.39      | 0.48      | 4.98         |

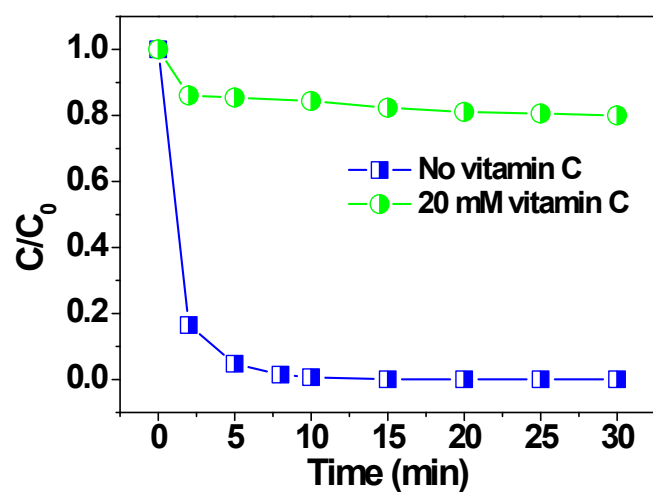

**Figure S1.** Effectiveness of vitamin C in terminating BPA degradation reaction. Experimental conditions: 0.2 g/L biochar, 0.1 g/L PMS, 10 mg/L BPA in 0.1 M phosphate buffer (pH=6.0).

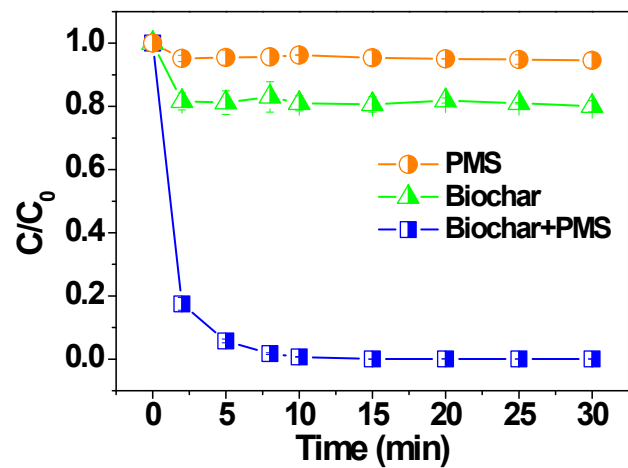

**Figure S2.** The contribution of biochar adsorption and PMS auto-decomposition to the overall BPA removal efficiency. Experimental conditions: 0.2 g/L biochar, 0.1 g/L PMS, 10 mg/L BPA in 0.1 M phosphate buffer (pH=6.0).

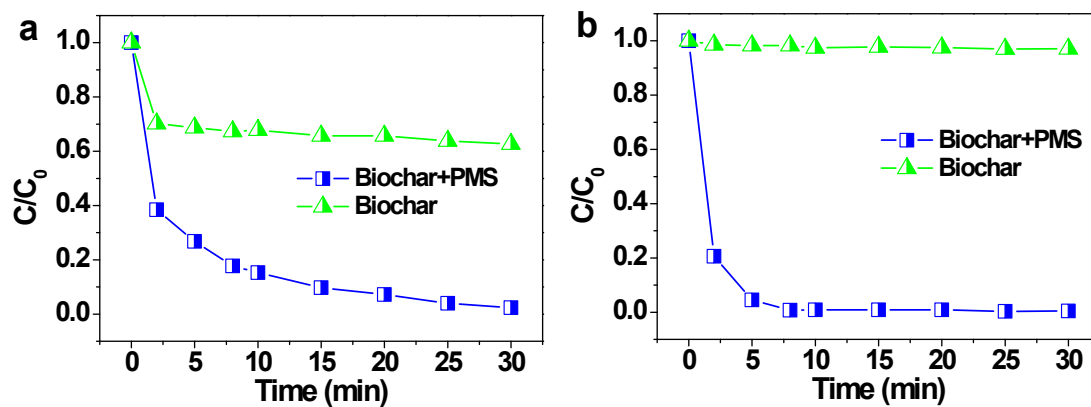

**Figure S3.** Catalytic activity of the biochar toward PMS for degradation of Rhodamin B (a) and phenol (b). Experimental conditions: 0.2 g/L catalyst, 0.1 g/L PMS, and 10 mg/L BPA in 0.1 M phosphate buffer (pH 6.0).

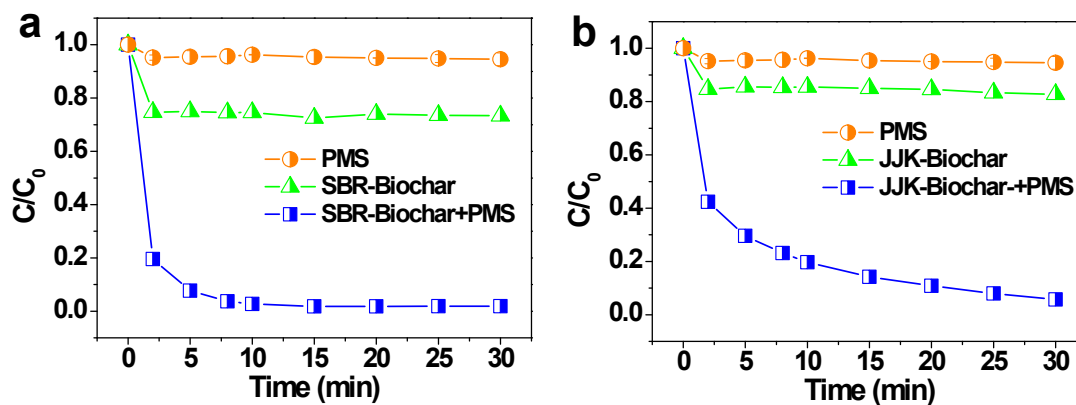

**Figure S4.** BPA degradation with biochars originated from bench-scale sequencing batch reactor (a) and Jinkai Wastewater Treatment Plant (b). Experimental conditions: 0.2 g/L catalyst, 0.1 g/L PMS, and 10 ppm initial BPA in 0.1 M phosphate buffer (pH 6.0).



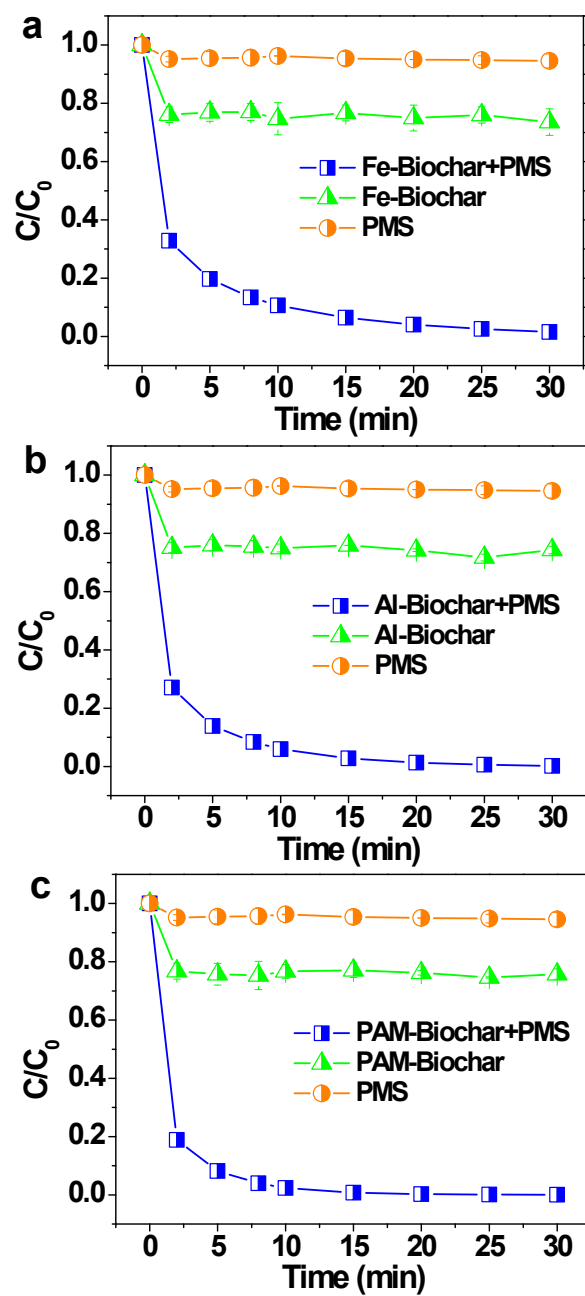

**Figure S5.** BPA degradation performance by using the biochars originated from the coagulant-pretreated sludge. 3 mg  $\text{Fe}^{3+}/\text{g}$  sludge (a), 3 mg  $\text{Al}^{3+}/\text{g}$  sludge (b), and 1 mg polyacrylamide/g sludge (c). BPA degradation conditions: 0.2 g/L catalyst, 0.1 g/L PMS, and 10 mg/L BPA in 0.1 M phosphate buffer (pH 6.0)

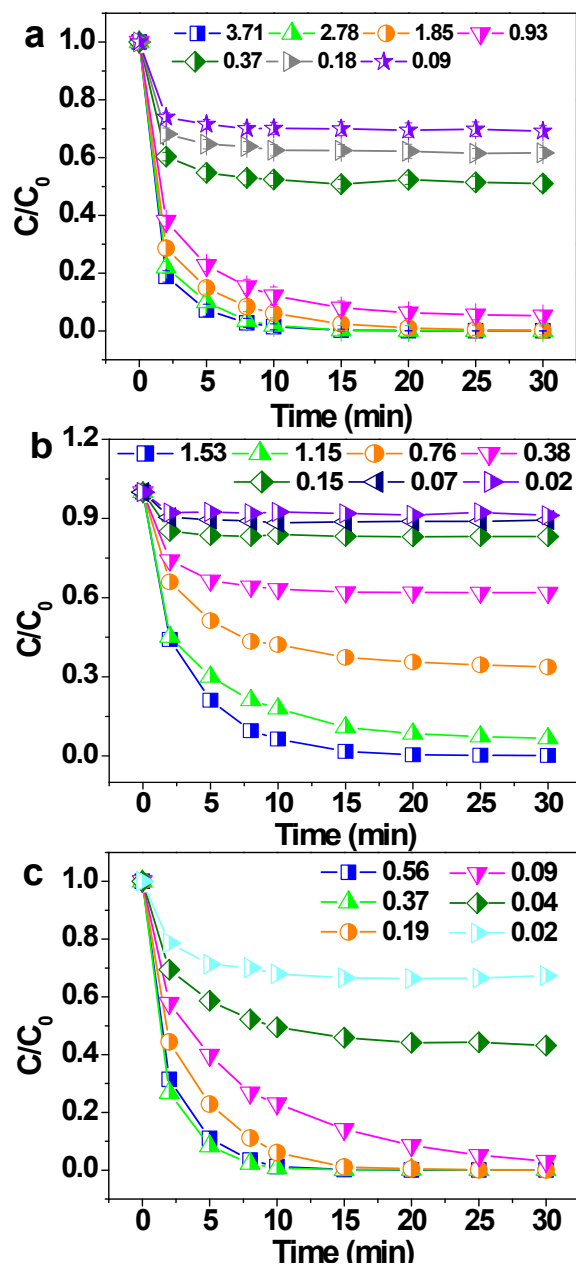

**Figure S6.** Effects of PMS dosage ( $[PMS]/[Pollutant]$ ) on BPA (a) and phenol (b) removal and influences of PDS ( $[PDS]/[BPA]$ ) dosages (c) on BPA removal. Experimental conditions: 0.2 g/L catalyst and 10 mg/L pollutants in 0.1 M phosphate buffer (pH 6.0).

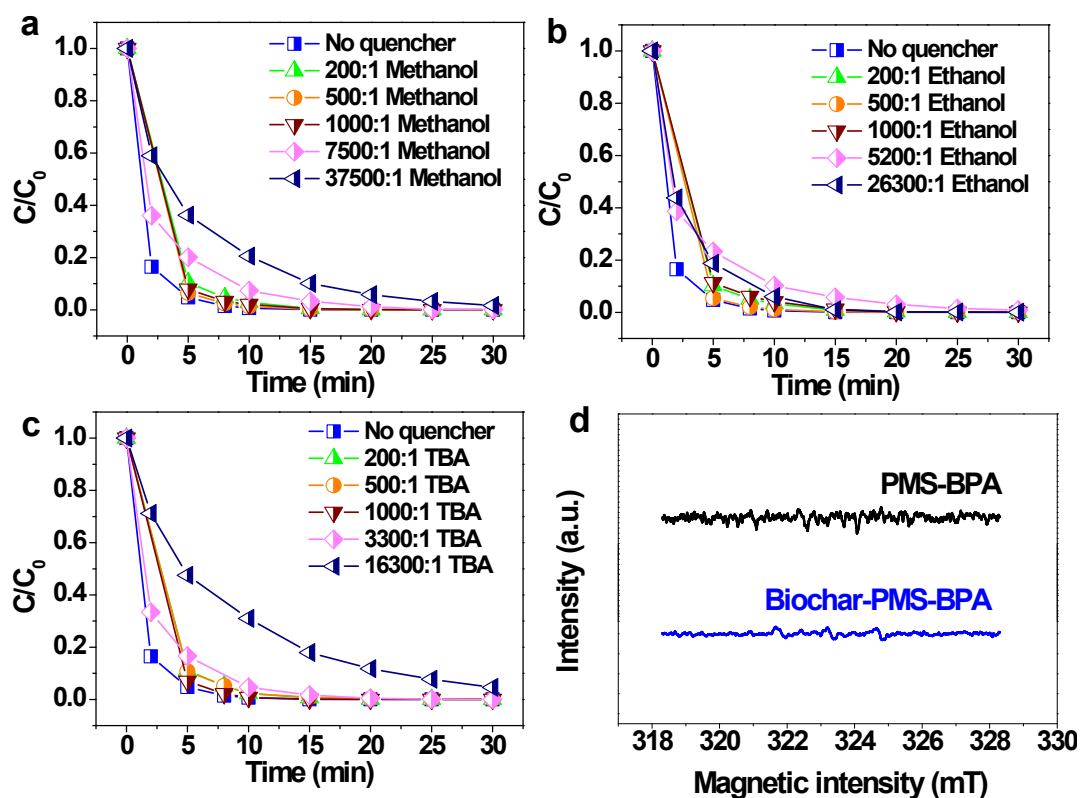

**Figure S7.** BPA removal performance in the presence of different mole ratios of methanol (a), ethanol (b), tert-butyl alcohol (c) to PMS. Electron spin resonance analysis by using 5,5-dimethylpyrroline-N-oxide as trapping agent (d). Experimental conditions: 0.2 g/L catalyst, 0.1 g/L PMS, and 10 mg/L BPA in 0.1 M phosphate buffer (pH 6.0).

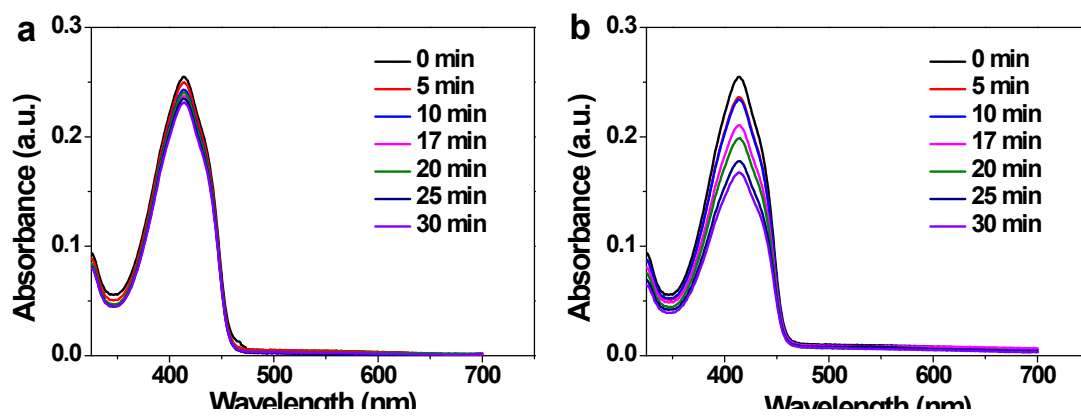

**Figure S8.** Absorption spectra of DPBF after dose of PMS (a) and biochar (b) into solution.

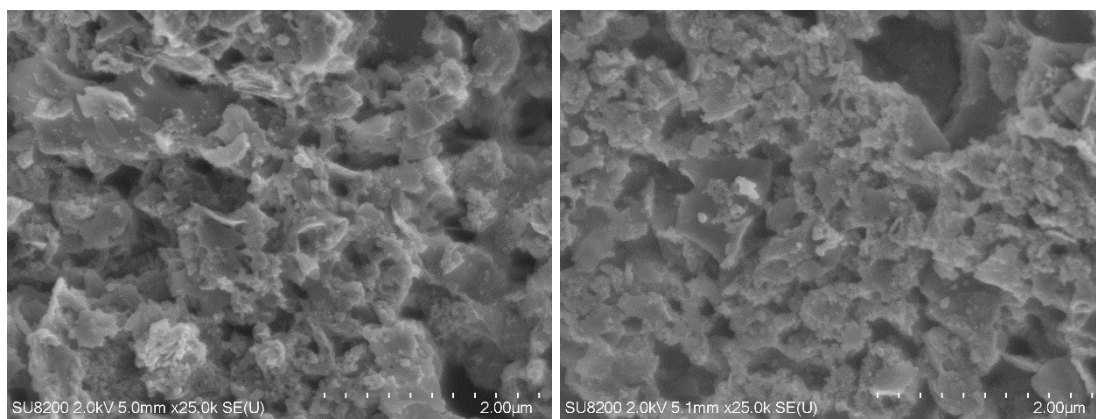

**Figure S9.** SEM images of the prepared biochar.

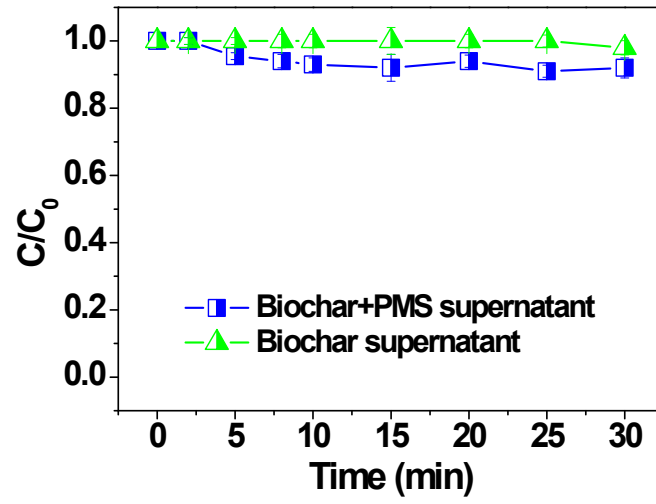

**Figure S10.** The impacts of supernatant derived from different reaction systems on BPA removal.

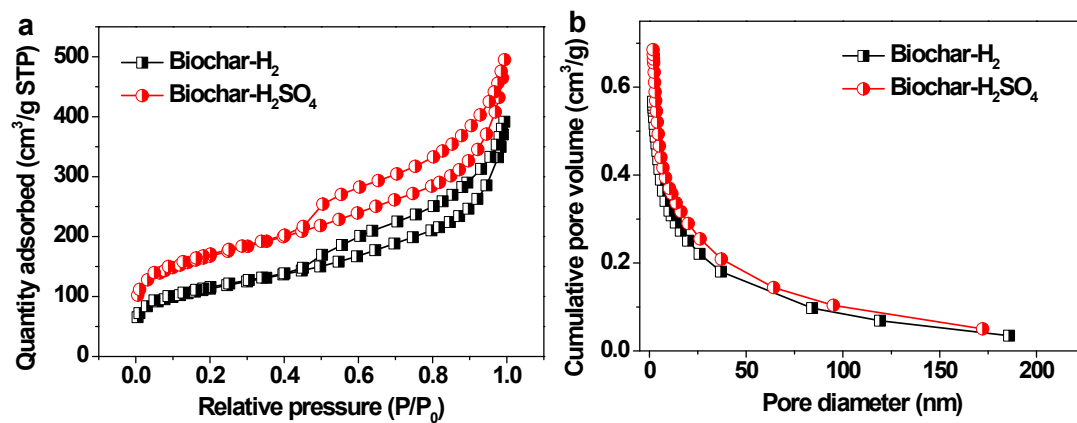

**Figure S11.** Nitrogen adsorption-desorption isotherms (a) and pore size distributions (b) of the biochars with different chemical treatments.

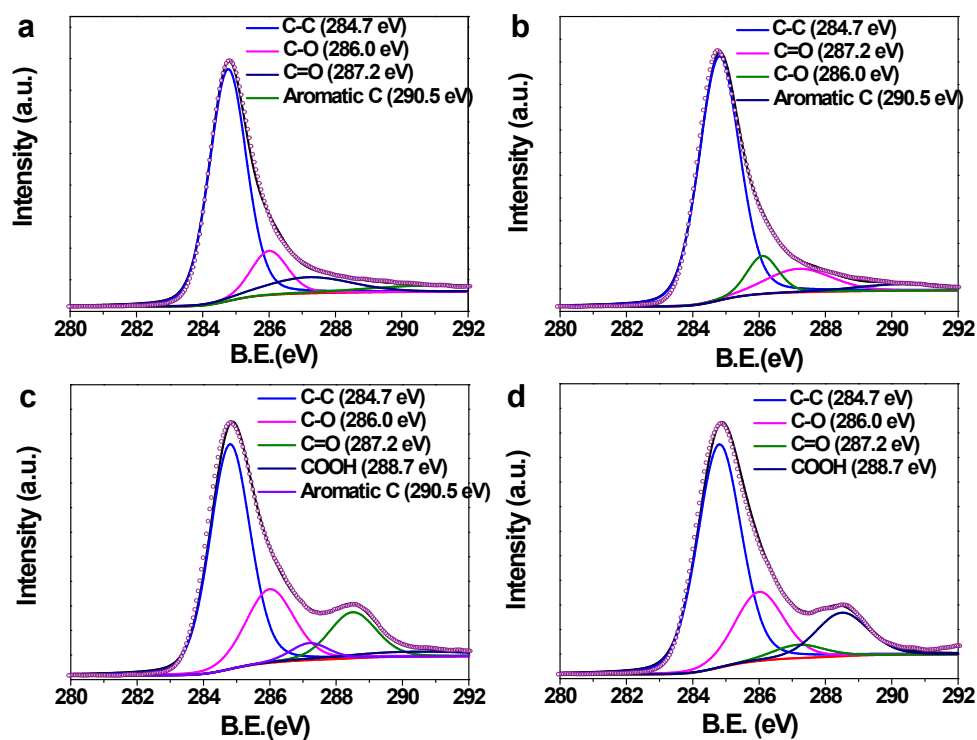

**Figure S12.** XPS spectra of C1s of the biochars treated with H<sub>2</sub> (a), N<sub>2</sub>H<sub>4</sub> (b), strong H<sub>2</sub>SO<sub>4</sub> (c), and strong HNO<sub>3</sub> (d).



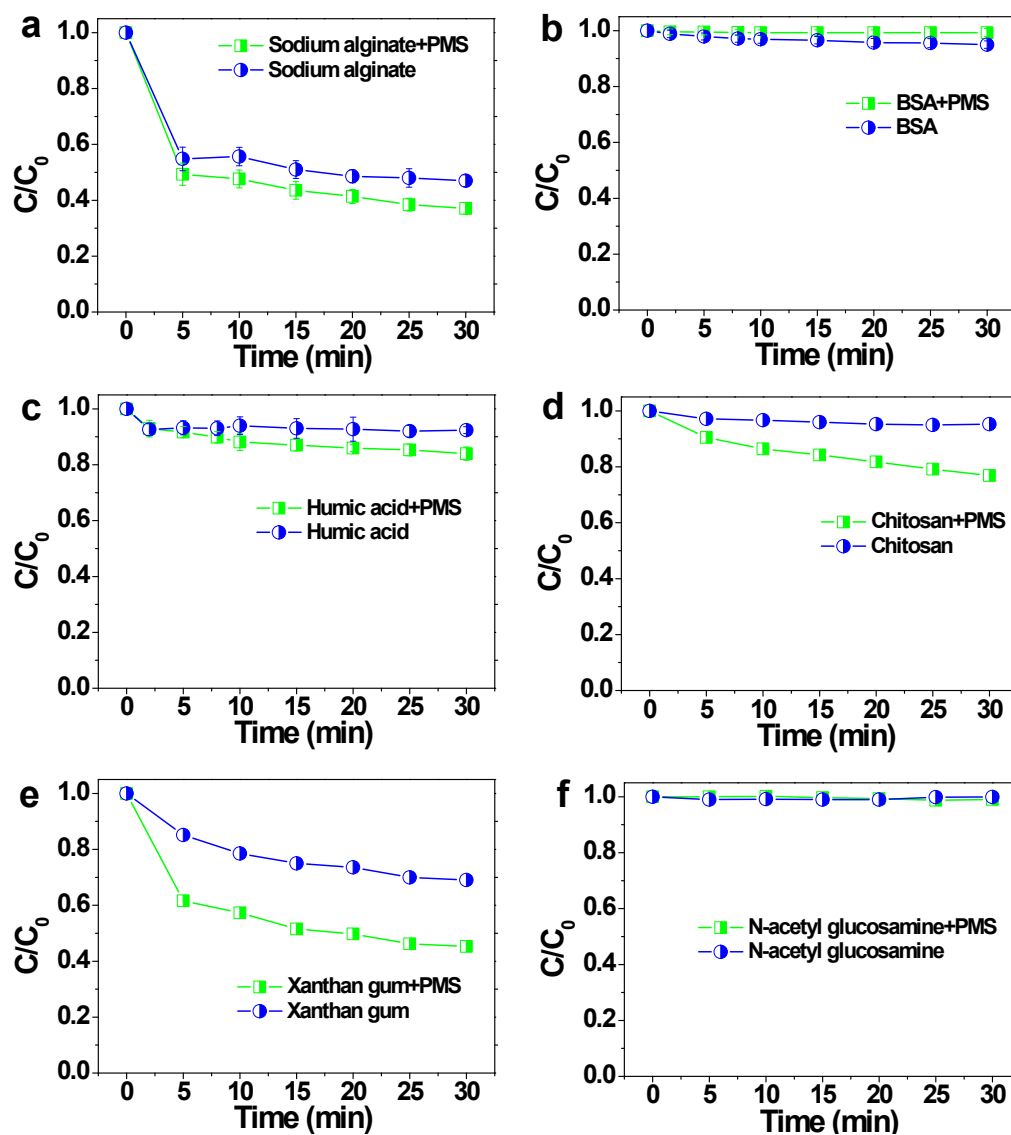

**Figure S13.** BPA removal performance by using sludge analogous components obtained as a catalyst to activate PMS. Experimental conditions: 0.2 g/L catalyst, 0.1 g/L PMS, and 10 mg/L BPA in 0.1 M phosphate buffer (pH 6.0).

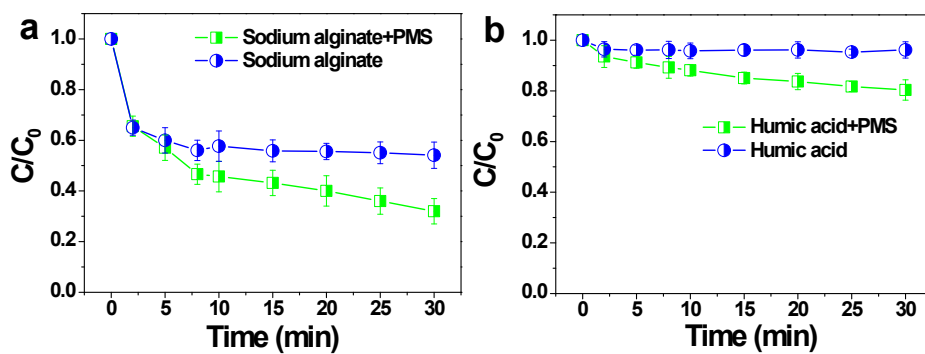

**Figure S14.** Effects of pre-mixing metals with sodium alginate (a) and humic acid (b) on the product's catalytic ability toward PMS to degrade BPA. Experimental conditions: 0.2 g/L catalyst, 0.1 g/L PMS, and 10 mg/L BPA in 0.1 M phosphate buffer (pH 6.0).

## References

- 1 H. Q. Sun, S. Z. Liu, G. L. Zhou, H. M. Ang, M. O. Tade, S. B. Wang, *Acs Appl. Mater. Inter.* 2012, **4**, 5466-5471.
- 2 H. Q. Sun, C. Kwan, A. Suvorova, H. M. Ang, M. O. Tade, S. B. Wang, *Appl. Catal. B-Environ.* 2014, **154**, 134-141.
- 3 X. G. Duan, H. Q. Sun, Y. X. Wang, J. Kang, S. B. Wang, *Acs Catal.* 2015, **5**, 553-559.
- 4 G. D. Fang, C. Liu, J. Gao, D. D. Dionysiou, D. M. Zhou, *Environ. Sci. Technol.* 2015, **49**, 5645-5653.
- 5 H. Lee, H. I. Kim, S. Weon, W. Choi, Y. S. Hwang, J. Seo, C. Lee, J. H. Kim, *Environ. Sci. Technol.* 2016, **50**, 10134-10142.
- 6 Y. Lei, C. S. Chen, Y. J. Tu, Y. H. Huang, H. Zhang, *Environ. Sci. Technol.* 2015, **49**, 6838-6845.
- 7 X. Li, Z. H. Wang, B. Zhang, A. I. Rykov, M. A. Ahmed, J. H. Wang, *Appl. Catal. B-Environ.* 2016, **181**, 788-799.
- 8 Y. Y. Ahn, E. T. Yun, J. W. Seo, C. Lee, S. H. Kim, J. H. Kim, J. Lee, *Environ. Sci. Technol.* 2016, **50**, 10187-10197.
- 9 X. N. Li, Z. M. Ao, J. Y. Liu, H. Q. Sun, A. I. Rykov, J. H. Wang, *Acs Nano* 2016, **10**, 11532-11540.
